# Supplementary material
Source: PubMed Central journal article supplement (PMC2229851)
Supplement: pbio.0050293.sg001.pdf [file pbio.0050293.sg001.pdf]

A

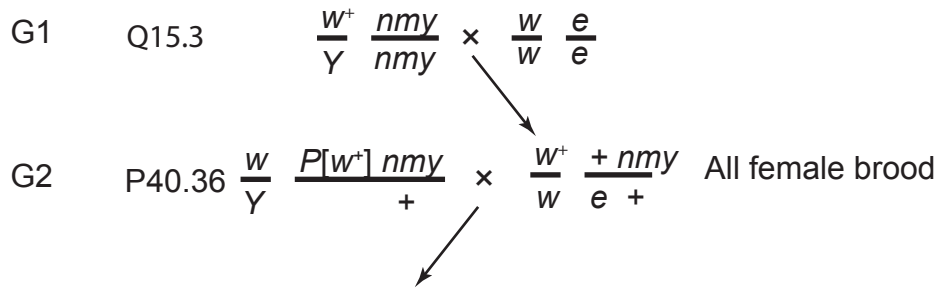

| G3 |                                          | #Exp    | #Obs | G3  |                                            | #Exp    | #Obs |
|----|------------------------------------------|---------|------|-----|--------------------------------------------|---------|------|
| 1. | $\frac{w}{Y} \frac{+ P[w^+] nmy}{+ nmy}$ | (1-s)/8 | 2*   | 9.  | $\frac{w^+}{Y} \frac{+ P[w^+] nmy}{+ nmy}$ | (1-s)/8 | 15*  |
| 2. | $\frac{w}{Y} \frac{+ P[w^+] nmy}{+ +}$   | s/8     | 25   | 10. | $\frac{w^+}{Y} \frac{+ P[w^+] nmy}{+ +}$   | s/8     | 16   |
| 3. | $\frac{w}{Y} \frac{+ P[w^+] nmy}{e +}$   | (1-s)/8 | 27   | 11. | $\frac{w^+}{Y} \frac{+ P[w^+] nmy}{e +}$   | (1-s)/8 | 24   |
| 4. | $\frac{w}{Y} \frac{+ P[w^+] nmy}{e nmy}$ | s/8     | 1*   | 12. | $\frac{w^+}{Y} \frac{+ P[w^+] nmy}{e nmy}$ | s/8     | 4*   |
| 5. | $\frac{w}{Y} \frac{+ +}{+ nmy}$          | (1-s)/8 | } 27 | 13. | $\frac{w^+}{Y} \frac{+ +}{+ nmy}$          | (1-s)/8 | } 35 |
| 6. | $\frac{w}{Y} \frac{+ +}{+ +}$            | s/8     |      | 14. | $\frac{w^+}{Y} \frac{+ +}{+ +}$            | s/8     |      |
| 7. | $\frac{w}{Y} \frac{+ +}{e +}$            | (1-s)/8 | } 35 | 15. | $\frac{w^+}{Y} \frac{+ +}{e +}$            | (1-s)/8 | } 27 |
| 8. | $\frac{w}{Y} \frac{+ +}{e nmy}$          | s/8     |      | 16. | $\frac{w^+}{Y} \frac{+ +}{e nmy}$          | s/8     |      |

\* Expressing sex-ratio

Figure S1

B

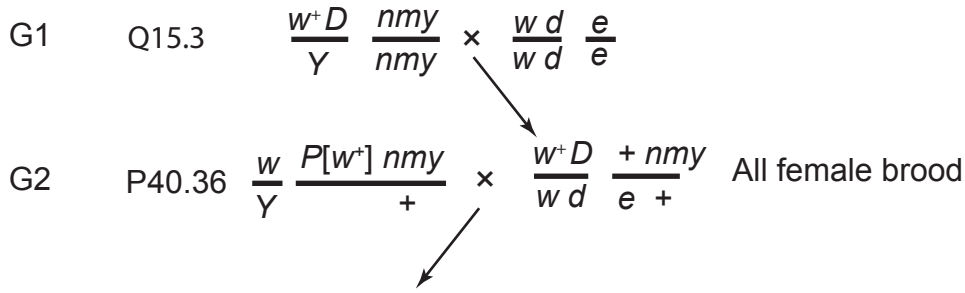

| G3  |                                            | #Exp           | #Obs |                                              |                                              | #Exp           | #Obs |
|-----|--------------------------------------------|----------------|------|----------------------------------------------|----------------------------------------------|----------------|------|
| 1.1 | $\frac{w D}{Y} \frac{+ P[w^+] nmy}{+ nmy}$ | $r(1-s)/8$     | 2*   | 9.1                                          | $\frac{w^+ D}{Y} \frac{+ P[w^+] nmy}{+ nmy}$ | $(1-r)(1-s)/8$ | 15*  |
| 1.2 | $\frac{w d}{Y} \frac{+ P[w^+] nmy}{+ nmy}$ | $(1-r)(1-s)/8$ | } 25 | 9.2                                          | $\frac{w^+ d}{Y} \frac{+ P[w^+] nmy}{+ nmy}$ | $r(1-s)/8$     | } 16 |
| 2.1 | $\frac{w D}{Y} \frac{+ P[w^+] nmy}{+ +}$   | $rs/8$         |      | 10.1                                         | $\frac{w^+ D}{Y} \frac{+ P[w^+] nmy}{+ +}$   | $(1-r)s/8$     |      |
| 2.2 | $\frac{w d}{Y} \frac{+ P[w^+] nmy}{+ +}$   | $(1-r)s/8$     |      | 10.2                                         | $\frac{w^+ d}{Y} \frac{+ P[w^+] nmy}{+ +}$   | $rs/8$         |      |
| 3.1 | $\frac{w D}{Y} \frac{+ P[w^+] nmy}{e +}$   | $r(1-s)/8$     |      | 11.1                                         | $\frac{w^+ D}{Y} \frac{+ P[w^+] nmy}{e +}$   | $(1-r)(1-s)/8$ |      |
| 3.2 | $\frac{w d}{Y} \frac{+ P[w^+] nmy}{e +}$   | $(1-r)(1-s)/8$ | 11.2 | $\frac{w^+ d}{Y} \frac{+ P[w^+] nmy}{e +}$   | $r(1-s)/8$                                   |                |      |
| 4.1 | $\frac{w d}{Y} \frac{+ P[w^+] nmy}{e nmy}$ | $(1-r)s/8$     | 12.1 | $\frac{w^+ d}{Y} \frac{+ P[w^+] nmy}{e nmy}$ | $rs/8$                                       |                |      |
| 4.2 | $\frac{w D}{Y} \frac{+ P[w^+] nmy}{e nmy}$ | $rs/8$         | 1*   | 12.2                                         | $\frac{w^+ D}{Y} \frac{+ P[w^+] nmy}{e nmy}$ | $(1-r)s/8$     | 4*   |

\* Expressing sex-ratio

Figure S1
