# Supplementary material
Source: PubMed Central journal article supplement (PMC2229851)
Supplement: pbio.0050293.sg002.pdf [file pbio.0050293.sg002.pdf]

G1 *w Dox/Y; nt; P40L12 nmy/ III* × *C(1)RM y w/Y; nt; III*  
*w Dox/Y; nt; #/ III* × *X; +; + (or X; +; +)*

G2 *C(1)RM y w/Y; nt; P40L12 nmy/ III* × *X/Y; nt/+; #/+ (or X/Y; nt; #/+)*

|                                           | Sex ratio ( <i>k</i> )       |                       |                                                      |
|-------------------------------------------|------------------------------|-----------------------|------------------------------------------------------|
|                                           | <i>w Dox; nt; III (simB)</i> | <i>w; e</i>           | <i>y w<sup>am</sup> v<sup>2</sup> f<sup>66</sup></i> |
| G3 <i>X/Y; nt; P40L12 nmy/ P38-11 nmy</i> | 0.816 ± 0.009<br>(32)        | 0.538 ± 0.013<br>(21) | 0.954 ± 0.007<br>(14)                                |
| <i>X/Y; nt; P40L12 nmy/ P38H77 Nmy</i>    | 0.505 ± 0.007<br>(26)        | 0.500 ± 0.008<br>(27) | 0.524 ± 0.007<br>(6)                                 |
|                                           | ***                          | *                     | ***                                                  |

Figure S2
