# Supplementary material
Source: PubMed Central journal article supplement (PMC2229851)

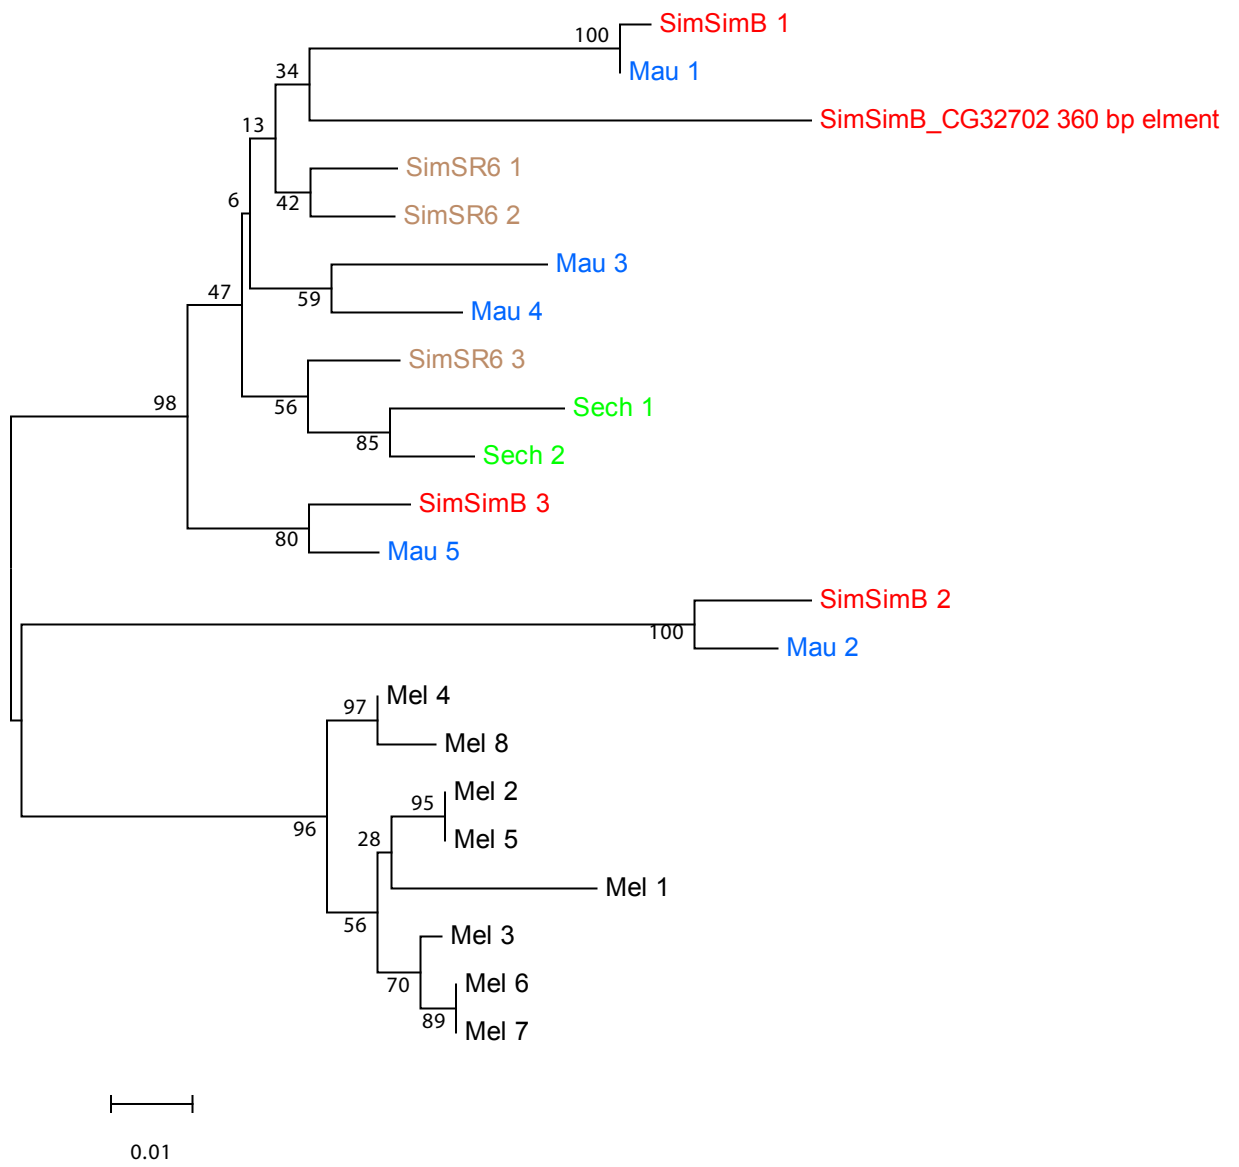

Figure S3

Supplement: pbio.0050293.sg003.pdf [file pbio.0050293.sg003.pdf]

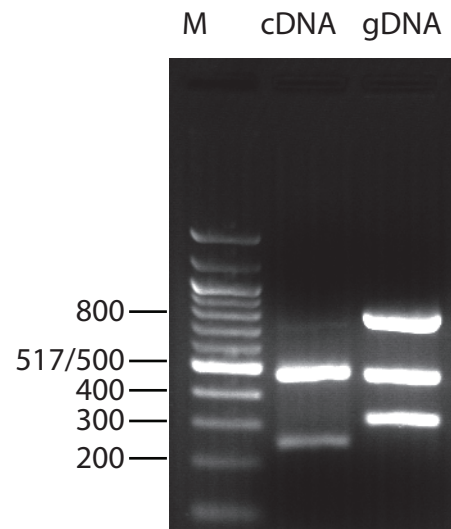

Figure S4

Supplement: pbio.0050293.sg004.pdf [file pbio.0050293.sg004.pdf]

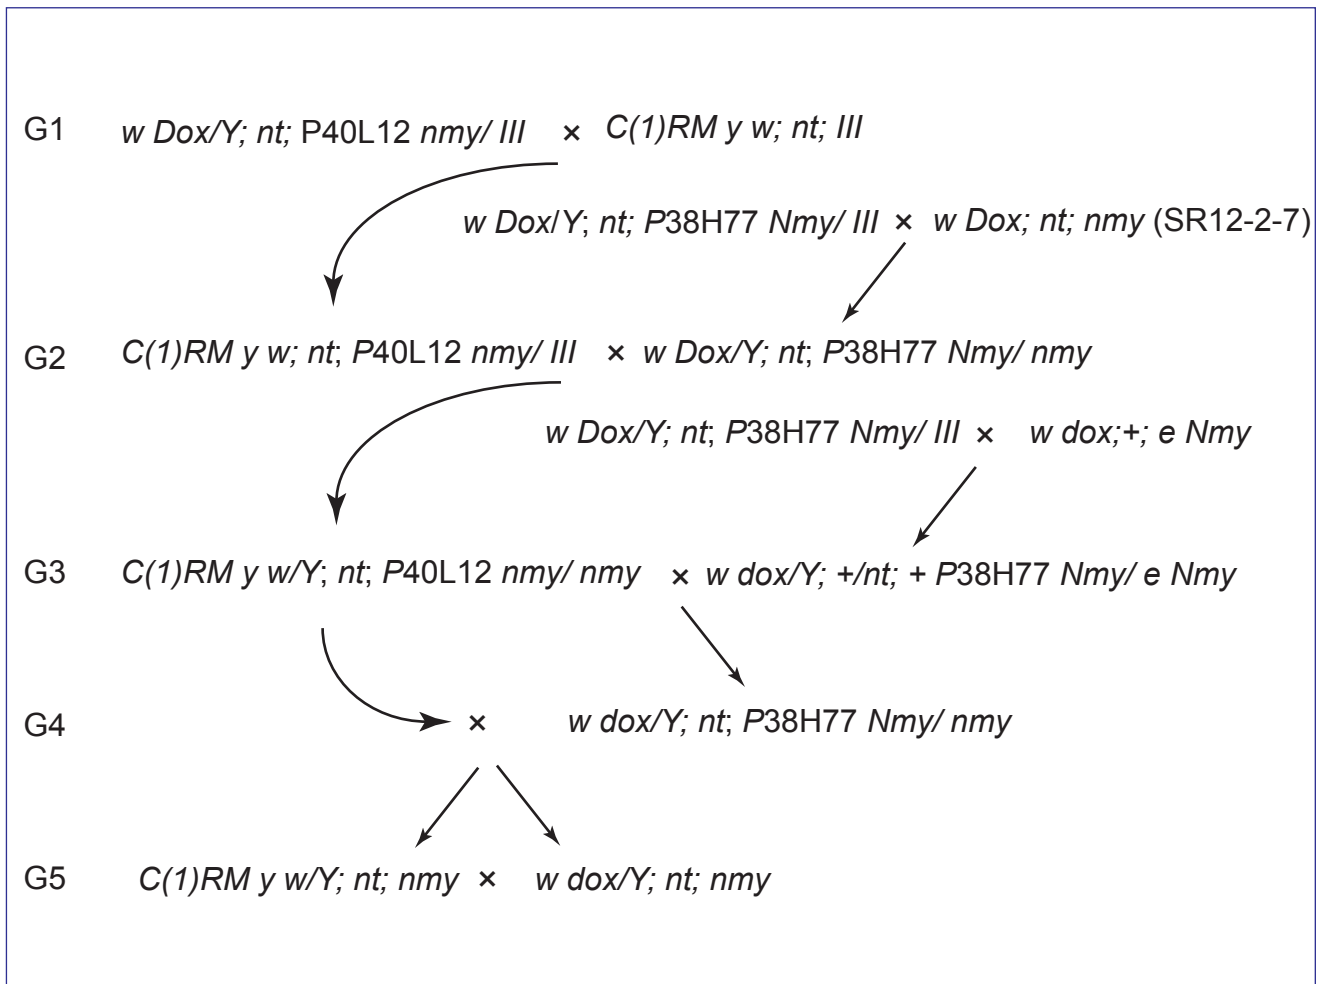

Figure S5

Supplement: pbio.0050293.sg005.pdf [file pbio.0050293.sg005.pdf]

A

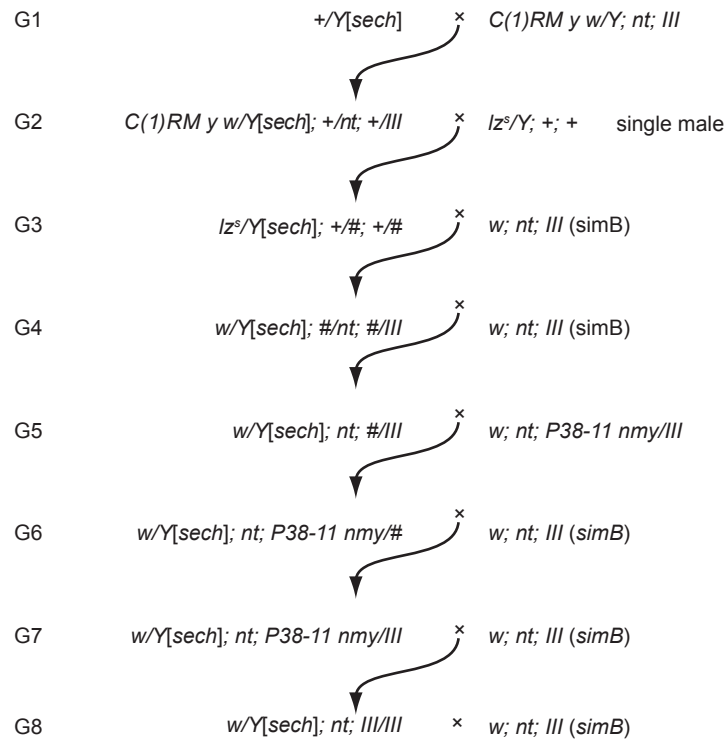

B

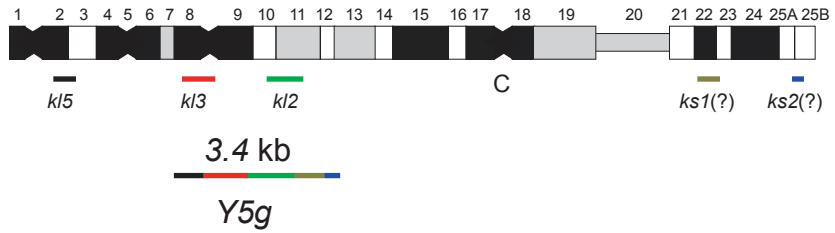

The Y chromosome of *D. melanogaster*

Figure S6

Supplement: pbio.0050293.sg006.pdf [file pbio.0050293.sg006.pdf]
